# Supplementary material for: Single-molecule analysis of genome-wide DNA methylation by fiber FISH coupled with atomic force microscopy
Source: Royal Society of Chemistry journal article supplement (doi:10.1039/d2an00216g), 2022-01-01
Supplement: d2an00216g1.pdf [file d2an00216g1.pdf]

Supporting Information

**Single-molecule analysis of genome-wide DNA  
methylation by fiber FISH coupled with atomic force  
microscopy**

Lingli Bu,<sup>a</sup> Tao Luo,<sup>a</sup> Jiangyu Yan,<sup>a</sup> Guorui Li,<sup>\*a</sup> Jing Huang<sup>\*a</sup>

<sup>a</sup> Institute of Chemical Biology and Nanomedicine (ICBN),  
State Key Laboratory of Chemo/Biosensing and Chemometrics, School of Biomedical Sciences,  
Hunan University, Changsha 410082, China.

\*Corresponding author. E-mail addresses: [liguorui@hnu.edu.cn](mailto:liguorui@hnu.edu.cn) (Guorui Li);  
[huangjing16@hnu.edu.cn](mailto:huangjing16@hnu.edu.cn) (Jing Huang)

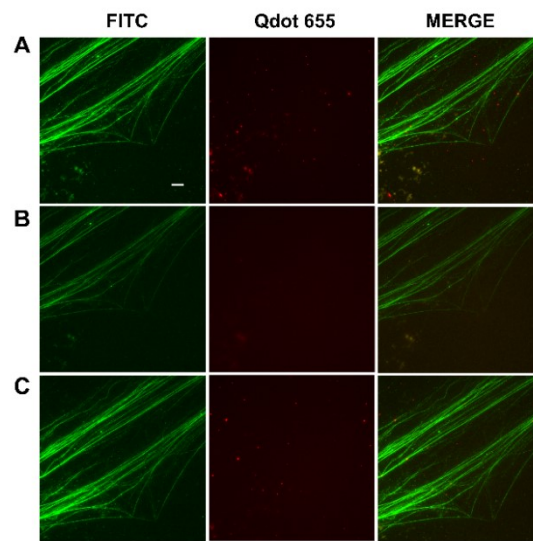

Fig. S1 Immunofluorescence images of DNA fiber with 5mC labeling (A) normal labeling (B) rinsed by stripping buffer (C) re-stained with antibodies. Scale bar, 10  $\mu$ m.

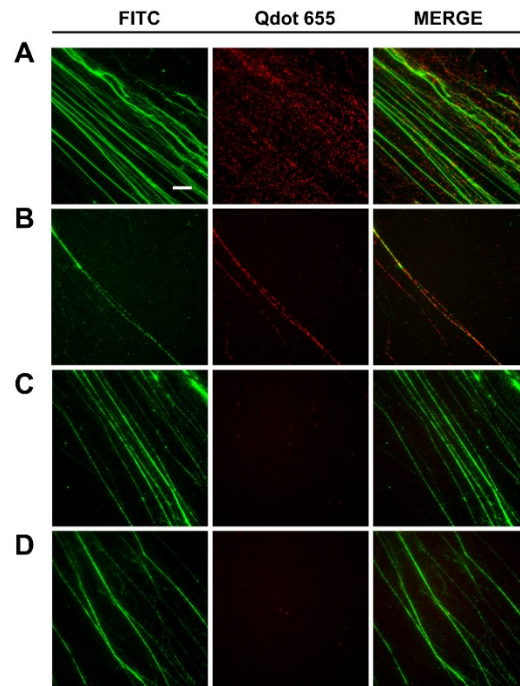

Fig. S2 Effect of Qdot 655 dilution ratio on the visualization of 5mC. (A) 1:1000, (B) 1:2000, (C) 1:5000, (D) 1:100000. Scale bar, 10  $\mu$ m.

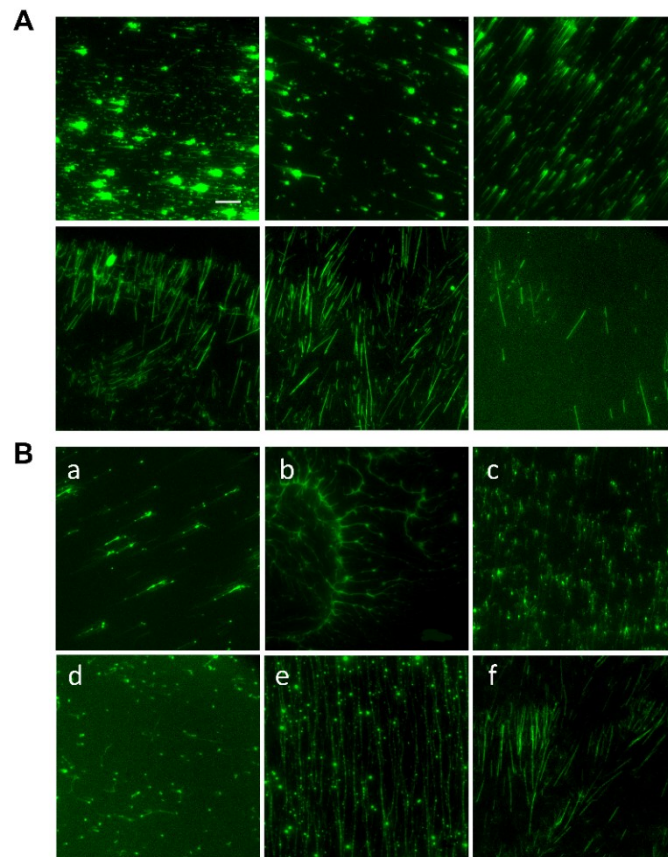

Fig. S3 (A) Effect of  $\lambda$ DNA concentration on DNA spreading (from left to right: 5, 3, 2, 1, 0.5, 0.05 ng/ $\mu$ L). (B) Effect of combing buffer and flow ways on DNA spreading (a) TE buffer and nitrogen blow, (b) SDS lysis buffer and nitrogen blow, (c) 10 mM HEPES, 50 mM NaCl, 3 mM MgCl<sub>2</sub>, 0.1 mM EDTA, 5% Tween-20 and nitrogen blow, (d) 50 mM HEPES, 100 mM NaCl, 1 mM MgCl<sub>2</sub> and nitrogen blow, (e) T buffer and gravity, (f) T buffer and nitrogen blow. Scale bar, 10  $\mu$ m.

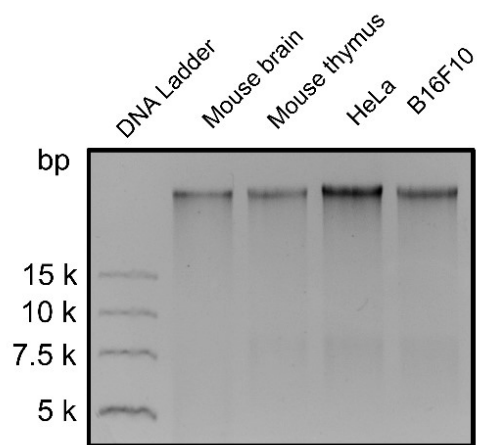

Fig. S4 Agarose gel electrophoresis (1%) of genomic DNA extracted from different cells and tissues.

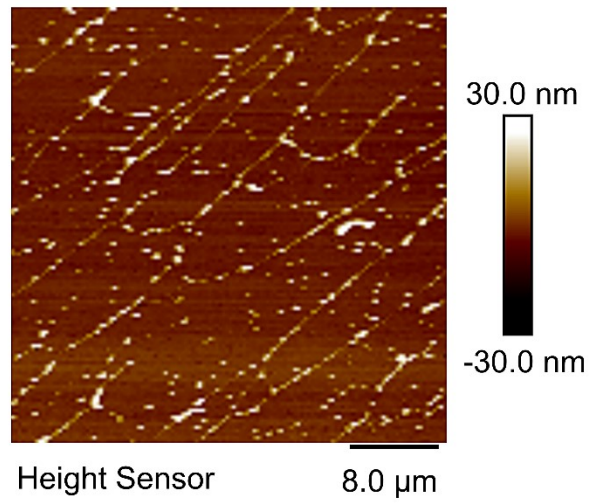

Fig. S5 AFM image of anti-5mC-DNA complexes on extended HeLa DNA.

Table S1. Detailed statistics of 5mC events by immunofluorescence assay

|     | Treatment  | Cell Type | Fibers |       |       |       |
|-----|------------|-----------|--------|-------|-------|-------|
|     |            |           | Exp.1  | Exp.2 | Exp.3 | Total |
| 5mC | Untreated  | HeLa      | 336    | 127   | 176   | 639   |
|     |            | B16F10    | 156    | 317   | 183   | 656   |
|     |            | A549      | 256    | 63    | 385   | 704   |
|     |            | MCF-7     | 157    | 124   | 281   | 562   |
|     | +5-aza-CdR | HeLa      | 135    | 77    | 179   | 391   |
|     |            | B16F10    | 112    | 100   | 144   | 356   |
|     |            | A549      | 176    | 158   | 128   | 462   |
|     |            | MCF-7     | 73     | 147   | 160   | 380   |

Table S2. Comparison with other methods for methylation analysis

| Technique                 | Basis                                                                    | Sample type                                           | Advantages and drawbacks                                                                                      | Ref.      |
|---------------------------|--------------------------------------------------------------------------|-------------------------------------------------------|---------------------------------------------------------------------------------------------------------------|-----------|
| Fluorescence              | dual endonucleases digestion coupling with RPA-assisted CRISPR/Cas13a    | Synthetic oligonucleotides                            | ultrahigh sensitivity (LOD 86.4 aM), outstanding selectivity, but only be used for synthetic oligonucleotides | [1]       |
| Chronoamperometry         | Hybridization Chain-Amplified Reaction                                   | Synthetic oligonucleotides                            | ideal specificity (LOD 0.93 aM), repeatability and stability, but only be used for synthetic oligonucleotides | [2]       |
| scWGBS                    | bisulfite based                                                          | very small cell populations and single cells          | single-base resolution, high cost and substantial DNA degradation during bisulfite treatment                  | [3]       |
| Electrochemical biosensor | Exo III digestion, bisulfite treatment                                   | Synthetic oligonucleotides                            | high sensitivity (LOD 4 fM), but only be used for synthetic oligonucleotides                                  | [4]       |
| SPR biosensor             | surface plasmon resonance, poly-purine hairpin probe                     | poly-purine reverse-Hoogsteen (PPRH) oligonucleotides | high sensitivity (LOD 115 pM), but only be used for synthetic oligonucleotides                                | [5]       |
| MeDIP-Seq                 | next-generation sequencing                                               | buffalo embryos                                       | single-base resolution, high cost, less sensitive in regions with high CpG density                            | [6]       |
| Digital PCR               | microfluidic chip-based digital PCR                                      | lung adenocarcinoma and adjacent non-tumorous tissues | ultra-low DNA input, easy primer design, but loci-specific studies only                                       | [7]       |
| Microarray                | gene expression microarray and DNA methylation microarray, TCGA database | breast cancer tissues                                 | pre-designed panel covering hotspot methylation, low genome-wide coverage of CpGs                             | [8]       |
| Optical mapping           | Reduced representation optical methylation mapping (ROM)                 | chromosomal DNA molecules                             | Long-read, kilobase pair-scale genomic methylation patterns, particular instrument (Bionano Genomics)         | [9]       |
| FISH-AFM                  | DNA fiber-based fluorescence in situ hybridization, AFM                  | several cell lines and tissues                        | Long-read, low cost, genome-wide DNA methylation analysis, reproducibility, low DNA input, less sensitivity   | This work |



Table S3. The OD<sub>260/280</sub> values of genomic DNA from different sources

| Source of DNA | OD 260/280 |
|---------------|------------|
| Mouse brain   | 1.83       |
| Mouse thymus  | 1.83       |
| HeLa          | 1.86       |
| B16F10        | 1.85       |

Table S4. 5mC dots per  $\mu\text{m}$  DNA by immunofluorescence and AFM

|              | IF                  | AFM                 |
|--------------|---------------------|---------------------|
| HeLa         | 0.3780 $\pm$ 0.0028 | 0.3908 $\pm$ 0.0414 |
| B16F10       | 0.5289 $\pm$ 0.0072 | 0.5469 $\pm$ 0.0176 |
| A549         | 0.6014 $\pm$ 0.0183 | -                   |
| MCF-7        | 0.4145 $\pm$ 0.0025 | -                   |
| Mouse brain  | -                   | 0.6125 $\pm$ 0.0231 |
| Mouse thymus | -                   | 0.5953 $\pm$ 0.0137 |

## References

- [1] X. Wang, S. Zhou, C. Chu, M. Yang, D. Huo and C. Hou, *ACS Sen.*, 2021, **6**, 2419-2428.
- [2] X. Chen, J. Huang, S. Zhang, F. Mo, S. Su, Y. Li, L. Fang, J. Deng, H. Huang and Z. Luo, *ACS Appl. Mater. Interfaces*, 2019, **11**, 3745-3752.
- [3] M. Farlik, N. C. Sheffield, A. Nuzzo, P. Datlinger, A. Schönegger, J. Klughammer and C. Bock, *Cell Rep.*, 2015, **10**, 1386-1397.
- [4] Q. Feng, L. Qin, M. Wang and P. Wang, *Biosens. Bioelectron*, 2020, **149**, 111847.
- [5] C. S. Huertas, A. Aviñó, C. Kurachi, A. Piqué, J. Sandoval, R. Eritja, M. Esteller and L. M. Lechuga, *Biosens. Bioelectron*, 2018, **120**, 47-54.
- [6] S. Malpotra, M. K. Singh and P. Palta, *Anim. Biotechnol.*, 2021, 1-17.
- [7] Z. Wu, Y. Bai, Z. Cheng, F. Liu, P. Wang, D. Yang, G. Li, Q. Jin, H. Mao and J. Zhao, *Biosens. Bioelectron*, 2017, **96**, 339-344.
- [8] S. Y. Li, H. C. Wu, H. F. Mai, J. X. Zhen, G. S. Li and S. J. Chen, *J. Cell. Biochem.*, 2019, **120**, 658-670.
- [9] H. Sharim, A. Grunwald, T. Gabrieli, Y. Michaeli, S. Margalit, D. Torchinsky, R. Arielly, G. Nifker, M. Juhasz and F. Gularek, *Genome Res.*, 2019, **29**, 646-656.
